1 **Mechanistic macroecology: exploring the drivers of latitudinal variation in terrestrial body**  
2 **size in a General Ecosystem Model**

3

4 **RUNNING TITLE:** Mechanistic macroecology in a GEM

5

6

7 **KEYWORDS:** Bergmann's rule, Mechanistic macroecology, General Ecosystem Model, Madingley,  
8 thermoregulation, resource availability, body mass, body size, mechanism.

9

10

11 **ABSTRACT**

12 Many mechanisms have been hypothesized to explain Bergmann's rule - the correlation of body size with  
13 latitude. However, it is not feasible to assess the contribution of hypothesised mechanisms by experimental  
14 manipulation or statistical correlation. Here, we evaluate two of the principal hypothesised mechanisms,  
15 related to thermoregulation and resource availability, using structured experiments in a mechanistic global  
16 ecosystem model. We simulated the broad structure of assemblages and ecosystems using the Madingley  
17 model, a mechanistic General Ecosystem Model (GEM). We compared emergent modelled biogeographic  
18 patterns in body mass to empirical patterns for mammals and birds. We then explored the relative  
19 contribution of thermoregulation and resource availability to body mass clines by manipulating the model's  
20 environmental gradients. Madingley produces body size gradients that are in broad agreement with empirical  
21 estimates. Thermoregulation and resource availability were both important controls on body mass for  
22 endotherms, but only temperature for ectotherms. Our results suggest that seasonality explains animal body  
23 mass patterns through a complex set of mechanisms. Process-based GEMs generate broadly realistic  
24 biogeographic body mass patterns. Ecologists can use them in novel ways: to explore causality, or for  
25 generating and testing hypotheses for large-scale, emergent ecological patterns. At the same time,

26 macroecological patterns are useful for evaluating mechanistic models. Iteratively developing GEMs, and  
27 evaluating them against macroecological patterns, could generate new insights into the complex causes of  
28 such patterns.

29

30

31

## 32 **INTRODUCTION**

### 33 **The role of mechanistic models in macroecology**

34 The fields of macroecology and biogeography have traditionally adopted a strong observational and  
35 descriptive approach to understanding patterns of species distributions, community composition and  
36 biodiversity across space and time (Blackburn et al., 1999). Correlative, statistical approaches have been  
37 the primary tools for exploring such data but they are unable to establish causal relationships and can be  
38 difficult to transfer across geographic space, time and environmental space (Cabral et al., 2017).  
39 Mechanistic ecological models are a new approach that can complement such studies. They represent both  
40 the composition of ecosystems and the causal relationships determining that composition. So, they permit  
41 targeted exploration of causality in macroecology (Connolly et al., 2017), especially at the large scales at  
42 which experimental manipulation is not possible.

43

### 44 **Latitudinal variation in body size and the hypothesised mechanisms**

45 Bergmann's rule, representing one of the oldest recognized macroecological pattern (Bergmann, 1847),  
46 hypothesises that body size is positively correlated with latitude and elevation, with heat conservation  
47 increased in larger-bodied animals through a smaller surface-area-to-volume ratio (James 1970, Blackburn  
48 et al., 1999). Bergmann's rule can be considered an empirical generalisation (Mayr, 1956, Meiri, 2011) and  
49 has been applied in both inter- and intra-specific studies to a broad range of taxa, including ectotherms, in  
50 multiple geographic regions. Amongst endotherms, the majority of mammal and bird species appear to  
51 exhibit Bergmann clines (Ashton, 2002; Cardillo, 2002; Freckleton et al., 2003; Meiri et al., 2004;

52 Rodriguez et al., 2006; Ramirez et al., 2008; Rodríguez et al., 2008; Olson et al., 2009; Morales-Castilla et  
53 al. 2012a,b; Torres-Romero et al. 2016), though converse clines exist, for example in a group of  
54 subterranean rodents (Medina et al., 2007). In contrast, the evidence for ectotherms is highly ambiguous,  
55 with some taxa conforming well (Olalla-Tárraga and Rodríguez, 2007), whilst others show inverse clines  
56 (Mosseau, 1997; Ashton and Feldmann, 2003; Olalla-Tárraga and Rodríguez, 2007; Adams and Church,  
57 2008; Cvetkovic et al., 2009) and some show no clear pattern (Olalla-Tárraga et al., 2006; Pincheria-Donoso  
58 and Meiri, 2013; Feldman and Meiri, 2014, Slavenko et al. 2019). Accordingly, there is debate about  
59 whether Bergmann's rule should be considered for ectotherms at all (Watt et al., 2010; Olalla-Tárraga,  
60 2010). Therefore, we focus on latitudinal variation in the body size of endotherms in this study. Even with  
61 this choice and despite over 170 years of scientific research, both the generality and the underlying  
62 mechanism(s) of this ecogeographic rule thus remain disputed (James, 1970; Blackburn et al., 1999; Meiri  
63 and Dayan, 2003; Pincheria-Donoso, 2010; Meiri, 2011).

64  
65 Multiple mechanisms have been proposed to explain the observed patterns in body mass (Blackburn et al.,  
66 1999; Olalla-Tárraga, 2011) (Table 1). Here we describe two leading mechanisms hypothesised to  
67 determine body size clines, which will be the focus of this study.

68  
69 First, Bergmann's original hypothesis focuses on endotherms and suggests a thermoregulatory mechanism,  
70 proposing that larger organisms conserve heat more effectively in cooler environments, by virtue of their  
71 lower surface area to volume ratio, compared to smaller organisms. Therefore, a larger body size is an  
72 adaptation to cold environments because larger endotherms expend less energy per unit mass with  
73 decreasing temperature compared with smaller endotherms. Others have demonstrated that temperature  
74 seasonality can have a strong selection effect on body size patterns. Limited useful daylight time in seasonal  
75 environments can constrain species activity and impose stronger physiological limits in small bodied-  
76 species (Lindsay, 1966; Boyce, 1979).

77

78 The second mechanism relates to resource availability, which has been linked to several hypotheses.  
79 Rosenweig (1968) argued that maintenance of a particular body mass depends on a sufficient supply of  
80 food resources and to meet physiological demands, larger bodied species require more resources. He  
81 proposed that the net primary productivity of terrestrial communities increases with latitude, permitting  
82 larger sizes in higher latitudes. Giest (1987) argued that the increase in primary production with latitude  
83 permits the body sizes of herbivores to increase and consequently, the body size of their dependent  
84 carnivores. Further hypotheses have proposed that the seasonal variation of resources and in particular the  
85 amount of resources available during the reproduction and growing periods is critical for determining the  
86 body size that can be supported (McNab, 2010; Wolverton et al., 2009; Huston and Wolverton, 2011).  
87 Others, such as Lyndsay (1966) and Boyce (1979) proposed that increased seasonality of resource  
88 availability drives larger body sizes because large organisms are better able to resist longer periods of food  
89 scarcity because they have relatively more fat deposits and deplete them more slowly.

90

#### 91 **Aims of this study**

92 In reality, it is likely that the observed clines arise from interactions between several of these mechanisms  
93 (Mayr 1956). But one of the key challenges in resolving the causes of observed biogeographic patterns in  
94 animal body mass has been the difficulty in modelling them at regional and global scales. Although  
95 statistical modelling of empirical data is feasible, it is not an approach that can be used to resolve underlying  
96 mechanisms (i.e., correlation does not imply causation; Gaston, 2000; Marquet et al., 2014; Cabral et al.,  
97 2017). Alternative approaches that explicitly incorporate mechanisms are required. Doing so  
98 experimentally at global scales is infeasible, and hence using models based on underlying ecosystem theory  
99 and performing systematic, ‘knockout’ experiments to test the importance of individual mechanisms is a  
100 promising, yet underexplored, approach. This approach is made possible by the recent development of  
101 general ecosystem models (GEMs; Purves et al., 2013), based on fundamental ecological principles, and  
102 allowing self-assembling ecosystems to generate emergent patterns - that can be assessed against empirical  
103 data.

104

105 Here we explore the thermoregulation and resource availability mechanisms hypothesised to be responsible  
106 for latitudinal variation in endotherm body size. We apply a series of structured simulation experiments  
107 using the Madingley General Ecosystem Model (GEM), a global, virtual ecological world based on  
108 prominent ecological theories (Harfoot et al. 2014). In these simulations, macroecological patterns are  
109 entirely emergent, bottom-up, from ecological principles encoded within the Madingley model at the  
110 individual level. Therefore, we begin by evaluating the modelled biogeographic patterns in animal body  
111 mass against empirically derived patterns to demonstrate that the model can generate body size gradients  
112 that are comparable to those estimated empirically. Because of the ambiguity of latitudinal body size  
113 gradients in ectotherms, we focus on emergent endotherm patterns. Subsequently, to explore the relative  
114 importance of thermoregulation and resource availability hypotheses in driving biogeographic patterns in  
115 terrestrial animal body mass, we isolate and manipulate the model's environmental gradients in absolute  
116 and seasonality of temperature and productivity, and examine their effects on modelled animal assemblages.

117

118

## 119 **MATERIALS AND METHODS**

120

### 121 **The Madingley General Ecosystem Model**

122 The Madingley model is a mechanistic and individual-based model of whole ecosystems. It was  
123 developed with the dual aims of synthesizing and advancing our understanding of ecology, and of  
124 enabling mechanistic prediction of the structure and function of whole ecosystems at various levels of  
125 organisation. It is not a statistical model built to fit data on Bergmann clines as closely as possible. Rather  
126 Madingley encodes prominent ecological theories that govern the metabolism, resource consumption,  
127 reproduction, movement and mortality and attempts to use these to generate realistic emergent properties,  
128 including latitudinal variation in community body size. It is general in the sense that it applies these same  
129 functions to all organisms in all ecosystems and individual-based because the functions are specified at

130 the level of individual organisms. As far as we are aware it is the only model able to decompose  
131 mechanisms driving patterns in organismal body mass.

132

### 133 *Pertinent components*

134 A comprehensive description of the model is provided by Harfoot et al (2014). Here we summarise the  
135 model's pertinent components, which simulate the dynamics of plants, and all heterotrophs with body  
136 masses above  $4 \times 10^{-4}$ g that feed on living organisms. Organisms are not characterised by species identity  
137 and are instead grouped according to a set of categorical functional traits - for example trophic level  
138 (herbivores, omnivores and carnivores), reproductive strategy (semelparity vs. iteroparity),  
139 thermoregulatory mode (endothermy vs. ectothermy), and mobility for animals. These traits determine the  
140 types of ecological interactions that modelled organisms are involved in, whilst a set of continuous traits -  
141 total biomass of autotrophs; and current body mass, juvenile body mass, adult body mass, and optimal  
142 prey size of omnivorous and carnivorous heterotrophs - determine the rates of each process.

143

### 144 *Plants*

145 On land, plants are represented by stocks, or pools, of biomass modelled using a terrestrial carbon model.  
146 Biomass is added to the stocks through the process of primary production, the seasonality of which is  
147 calculated using remotely sensed Net Primary Productivity data (Harfoot et al., 2014). This production is  
148 allocated to above-ground/below-ground, structural/non-structural, evergreen/deciduous components. The  
149 Madingley model assumes that all above-ground, non-structural, matter is available for heterotrophic  
150 organisms to consume. Biomass is lost from plant stocks through mortality from fire and senescence, as  
151 well as through herbivory, which is described in more detail below. Production, allocation and mortality,  
152 in the plant model, are all determined by environmental conditions (temperature, number of frost days,  
153 precipitation, and the available water capacity of soils) (Smith et al., 2013).

154

### 155 *Animals*

156 Heterotrophic animals are represented in the model as ‘cohorts’, the fundamental agents of the model:  
157 collections of individual organisms occurring in the same modelled grid cell and that follow the same  
158 ecological trajectory, with identical categorical and continuous functional traits. Representing individual  
159 organisms is of course computationally unfeasible - there are simply too many individual organisms on  
160 Earth (Purves et al., 2013) - but the cohort approach enables the model to predict emergent ecosystem  
161 properties at organisational scales from individuals to the whole ecosystem. Heterotroph dynamics result  
162 from five ecological processes: metabolism, resource consumption, reproduction, mortality and dispersal  
163 (see Text S1 and Figure S1). The model can be considered as an ecological null model. It is intended to  
164 describe broad patterns, and hence does not include all ecological processes, such as, for example,  
165 ecological stoichiometry, behaviour (e.g. predator avoidance, sociality and intelligent movement) or  
166 microhabitat use. The model currently does not resolve flying organisms explicitly and so is more  
167 representative of non-volant organisms.

168  
169 All endothermic functional groups in the model were iteroparous and the initial juvenile and adult body  
170 masses were drawn randomly from realistic mass ranges. The minimum endotherm juvenile mass was  
171 0.004g, the smallest neonatal mass listed in the Pantheria database of extant and recently extinct mammal  
172 traits (Jones et al., 2009). The maximum adult mass was  $5 \times 10^6$ g for herbivorous endotherms ( $7 \times 10^5$ g for  
173 carnivorous endotherms,  $1.5 \times 10^6$ g for omnivorous endotherms) following maximal masses in these groups  
174 from the Elton Traits dataset (Wilman et al., 2014). Endothermic cohorts thermoregulate at  $37^\circ\text{C}$  at all times  
175 and this thermoregulation comes at no extra metabolic costs. This ecological simplification is necessary at  
176 present because in the real world the metabolic costs of thermoregulation are linked to numerous other  
177 aspects of an organism’s ecology. Namely, behavioural responses, for which there are multiple strategies.  
178 For example, increased metabolic costs from thermoregulation in adverse environments can be avoided by  
179 hibernation or dispersal to wait for or find more clement conditions (Geiser, 2013). The model is currently  
180 behaviourally naïve in this respect and so these costs are not presently incorporated.

181 The model attempts to represent all organisms within ecosystems interacting with each other through  
182 dynamic and emergent trophic networks, albeit with some interactions being stronger than others. In this  
183 way, the endotherm community, and hence their median body mass, is influenced by the ecology of  
184 ectotherms in the model. Ectotherms were either iteroparous or semelparous. Cohorts were initially seeded  
185 into the model ranging between  $4 \times 10^{-4}$ g as the smallest juvenile mass and  $2 \times 10^6$ g as the largest adult mass  
186 depending on the functional group. Ectotherm activity was limited by environmental conditions following  
187 empirically-derived relationships between activity, diurnal temperature ranges, annual mean temperature  
188 and annual variation (Sunday et al., 2010). After the initial quasi-random seeding, cohorts interact with  
189 each other and with plant stocks, influenced by the environment, to select for a dynamic equilibrium  
190 ecosystem composition.

191

#### 192 *Simulations*

193 The model is flexible with regard to spatial and temporal resolution. As described below we used two spatial  
194 resolutions, one at  $1^\circ \times 1^\circ$  to compare the model with empirical patterns, and the other at  $5^\circ \times 5^\circ$  for the set  
195 of knockout simulations. The coarser resolution was employed for computational efficiency given the 40  
196 model simulations required for the knockout experiments, and as in the original formulation (Harfoot et al.,  
197 2014), we used a monthly time step throughout. We modelled the terrestrial realm exclusively, as this realm  
198 has seen the most research into empirical Bergmann clines (though see Torres-Romero et al., 2016).  
199 Comparisons to marine patterns would make an interesting further exploration. We simulated ecosystem  
200 structure for all terrestrial landmass between  $65^\circ\text{N}$  to  $65^\circ\text{S}$  in latitude. Simulations were performed on  
201 windows server machines, using this Madingley C# codebase for the simulations to generate body mass  
202 patterns for evaluations: <https://github.com/mikeharfoot/C-sharp-version-of-Madingley>; and, this codebase  
203 for the knockout simulations: <https://github.com/mikeharfoot/Madingley-Bergmann-patterns>.

204

#### 205 **Evaluating emergent biogeographic patterns in body size**



206 The Madingley model has previously been demonstrated to capture observed properties of individual  
207 organisms and the coarse structure of ecosystems reasonably well under environmental conditions without  
208 human impact (Harfoot et al., 2014). To explore latitudinal patterns in animal body mass, we used emergent  
209 ecosystem structure in the global grid of  $1^\circ \times 1^\circ$  terrestrial cells. We evaluate these against mammalian data  
210 because the model is more representative of mammals than birds, as described above. Climatological  
211 environmental conditions for each grid-cell are read as model inputs from publicly-available datasets (see  
212 Harfoot et al., 2014). For air temperature, diurnal temperature range, precipitation and number of frost days  
213 these were calculated from WorldClim mid-Holocene (approximately 6,000 years ago) downscaling of the  
214 HadGEM2-ES model reconstruction (Hijmans et al., 2005). For soil water availability, there was no  
215 equivalent Holocene climate dataset so we used average values for the period 1960 – 2000. We used the  
216 same climatological time series for each of the 100 years of model simulations, to remove the effects of  
217 inter-annual environmental variation. Importantly, we also excluded effects of anthropogenic habitat  
218 conversion and harvesting of plant or animal biomass for human use. So, our simulations represent a late-  
219 Quaternary world that has received little anthropogenic influence.

220  
221 We performed 10 simulations with this protocol, in each case drawing different initial ecosystem states to  
222 capture the effects of variation in initial conditions and of stochasticity in ecological dynamics, and allowing  
223 the ecosystems to establish a quasi-steady state over a simulation length of 100 years. Figure S2 shows the  
224 temporal emergence of body mass gradients over time. It demonstrates that there is no body-mass cline  
225 associated with initial conditions. The final heterotroph biogeography is instead determined by the  
226 environmental and productivity conditions in each grid cell.

227  
228 To be consistent with the empirical body size gradients (described below), which do not take abundance  
229 into account, and use species maximum or a central estimate for adult body mass, we grouped cohorts  
230 (which represent functionally equivalent, hetero-specific individuals, at a specific life stage) by their unique  
231 adult body mass, creating pseudo-species. Whilst the adult-body mass of cohorts does not change through

232 time and so the mass of the resulting pseudo-species does not change, the composition of pseudo-species  
233 within an ecosystem can change through time. This can result from local extinction or dispersal. So, for  
234 each grid cell and each simulation we calculated the median across months of the median adult body mass  
235 of the pseudo-species present in that pixel. We calculated this using the quasi-steady state ecosystems of  
236 the final 12 months of each simulation. We took the median value across the 10 simulations as the central  
237 value across the ensemble of simulations.

238

239

#### 240 **Estimating empirical biogeographic patterns of animal body mass**

241 Estimates of the community mean body mass for mammals and birds were derived from extent of  
242 occurrence maps (EEO) and trait databases. We refer to these data as mean body mass from EEO. Extents  
243 of occurrence were intersected with the same  $1^\circ \times 1^\circ$  grid of cells used for the model simulations. For the  
244 species occurring in each grid cell, the median assemblage body mass was calculated (Cooper & Purvis,  
245 2010; Rapacciuolo et al., 2017).

246

247 As introduced above, we focus our evaluation of modelled biogeographic body mass patterns on  
248 endotherms, where there is much stronger evidence of latitudinal body mass clines. For mammals, where  
249 there is evidence that anthropogenic impacts have altered the latitudinal gradients in body mass (Faurby &  
250 Araújo, 2016; Santini et al., 2017b), we used Holocene body mass data and present-natural EEO from a  
251 pre-release version 1.1 of the Phylacine database (Faurby et al 2018). The original data for body sizes  
252 mainly comes from Faurby and Svenning (2015) and Smith et al 2003, while the data on ranges mainly  
253 comes from Faurby and Svenning (2016) and IUCN (2016). These estimate what the present range would  
254 be for each mammal species given a current climate but no human impacts. The Holocene EEO maps were  
255 projected in the Behrmann equal area coordinate system so the maps were sampled at the coordinates of  
256 the 1 decimal degree model grid cell centres projected to Behrmann coordinate system. Further details can  
257 be found in Supplementary Text S2.

258

## 259 **Evaluating modelled biogeographic patterns of animal body mass**

260 We evaluated emergent body mass patterns by calculating their correlation with empirical estimates across  
261 the global grid using modified t-tests to account for the loss of statistical power resulting from spatial  
262 autocorrelation (Dormann et al., 2007; Dutilleul et al., 2008). We log transformed body masses to give  
263 equal weight in the correlation to all body sizes across the orders of magnitude variation in sizes across the  
264 grid. We did not take phylogenetic correlation into account for three reasons. Firstly, because Madingley  
265 simulates cohorts of species that interact, survive or perish over time, which is different than simulating the  
266 evolution of species in phylogenies. Secondly, we focus on spatial patterns of body size rather than the time  
267 and mode in which these patterns emerge. Finally, we were not attempting to explain empirical body mass  
268 relationships with environments when phylogenetic signal should be accounted for.

269

## 270 **Isolating mechanisms driving body-mass patterns**

### 271 *Thermoregulation and resource availability hypotheses*

272 We conducted a set of environmental knockout simulation experiments in the model to investigate the two  
273 major hypothesised drivers of clines in body mass: thermoregulation and resource availability. Our  
274 simulations were designed to precisely evaluate how much an environmental feature is contributing to  
275 latitudinal gradients by quantifying how much body masses change when that feature is removed from the  
276 simulations. If body mass changes considerably in response to a knockout, to the extent that the latitudinal  
277 pattern is substantially altered then we can conclude that that feature and associated mechanism plays a  
278 dominant role in driving the modelled body size patterns. We considered two aspects of the  
279 thermoregulatory hypothesis. First, that the latitudinal gradients in annual mean temperature (mean monthly  
280 temperature across the year) selects for larger endotherms where annual mean temperature is lower. Second  
281 that variation in temperature through the year (seasonality of temperature) selects for larger body mass  
282 where seasonality of temperature is higher. We also considered whether these conditions select for smaller  
283 ectotherms, through their capacity to more effectively utilise benign windows in otherwise unsuitable

284 environments (e.g. Olalla-Tárraga and Rodríguez, 2007). Analogously to the temperature knockout  
285 simulations, we tested for the effects of latitudinal gradients in the cumulative annual net primary  
286 production and the variation in net primary productivity across months of the year (seasonality of  
287 production). Our prediction was that higher annual mean productivity (mean monthly productivity across  
288 the year) and greater seasonality of production selects for larger endotherms (Lindsey 1966, Rosenweig,  
289 1968, Boyce 1978, 1979). We therefore conducted, in addition to a full (control) simulation with no  
290 environmental feature changed, four knockout experiments in each of which we removed either a gradient  
291 or variation in one of these aspect of the environment at a time (Table 2, which lists treatment names, Fig  
292 S3). These knockout simulations were then compared to the full simulations.

293

#### 294 *Experimental protocol*

295 To account for stochastic effects, we performed an ensemble of 10 simulations for the control conditions  
296 and for each knockout, which yielded 50 simulation runs. It was computationally unfeasible to run these  
297 simulations at a resolution of  $1^\circ \times 1^\circ$ , so we used a coarser resolution of  $5^\circ \times 5^\circ$  cells with the same extent.  
298 The change in resolution resulted in consistent variation body mass across latitude, however in general the  
299 annual median, community median body size was larger in the coarser resolution simulations (Fig S4). For  
300 each knockout experiment, we used the median across the ensemble as the central estimate. For each  
301 knockout across each latitude band, we then calculated the relative median body mass deviation from the  
302 unmodified control simulation. Because the response of ectotherms can impact on that of endotherms, we  
303 include their response to environmental knockouts in the studies.

304

#### 305 *Exploring causation*

306 To further explore the causes of changes in latitudinal body mass clines in response to environmental  
307 knockouts, we analysed changes in individual level feeding, reproduction and mortality rates. We ran  
308 simulations for two grids of four  $5^\circ \times 5^\circ$  cells, one in North Asia ( $55\text{-}65^\circ\text{N}$  and  $75\text{-}85^\circ\text{E}$ ) and one in  
309 equatorial Africa ( $5^\circ\text{S}\text{-}5^\circ\text{N}$  and  $5\text{-}15^\circ\text{E}$ ). These grids were representative of different environments and

310 exhibited analogous patterns to the global simulation when run outside the global model. These simulations  
311 were run for 20 years and for each month we exported the process rates (feeding/assimilation, reproductive  
312 output, per capita mortality) of every cohort as well as cohort properties (e.g. current body mass, adult mass  
313 and cohort abundance). It was not possible to run a global simulation because of the prohibitively long  
314 runtimes and large volumes of individual level ecological data generated. Annual rates of the ecological  
315 processes were calculated for each individual within each cohort by summing the monthly outputs. See  
316 Text S3 for further methodological details.

317

## 318 **RESULTS**

319

### 320 **Global patterns of modelled animal body mass**

321 Spatial patterns of endotherm and ectotherm body mass emerge from the model without exogenous  
322 constraints based on its parsimonious descriptions of the ecological processes governing ecosystem  
323 structure and function (Figure S2). These patterns exhibit strong spatial and latitudinal variation (Figure 1).  
324 For endotherms, median body mass generally increases with aridity and with latitude (Figure 1a).

325

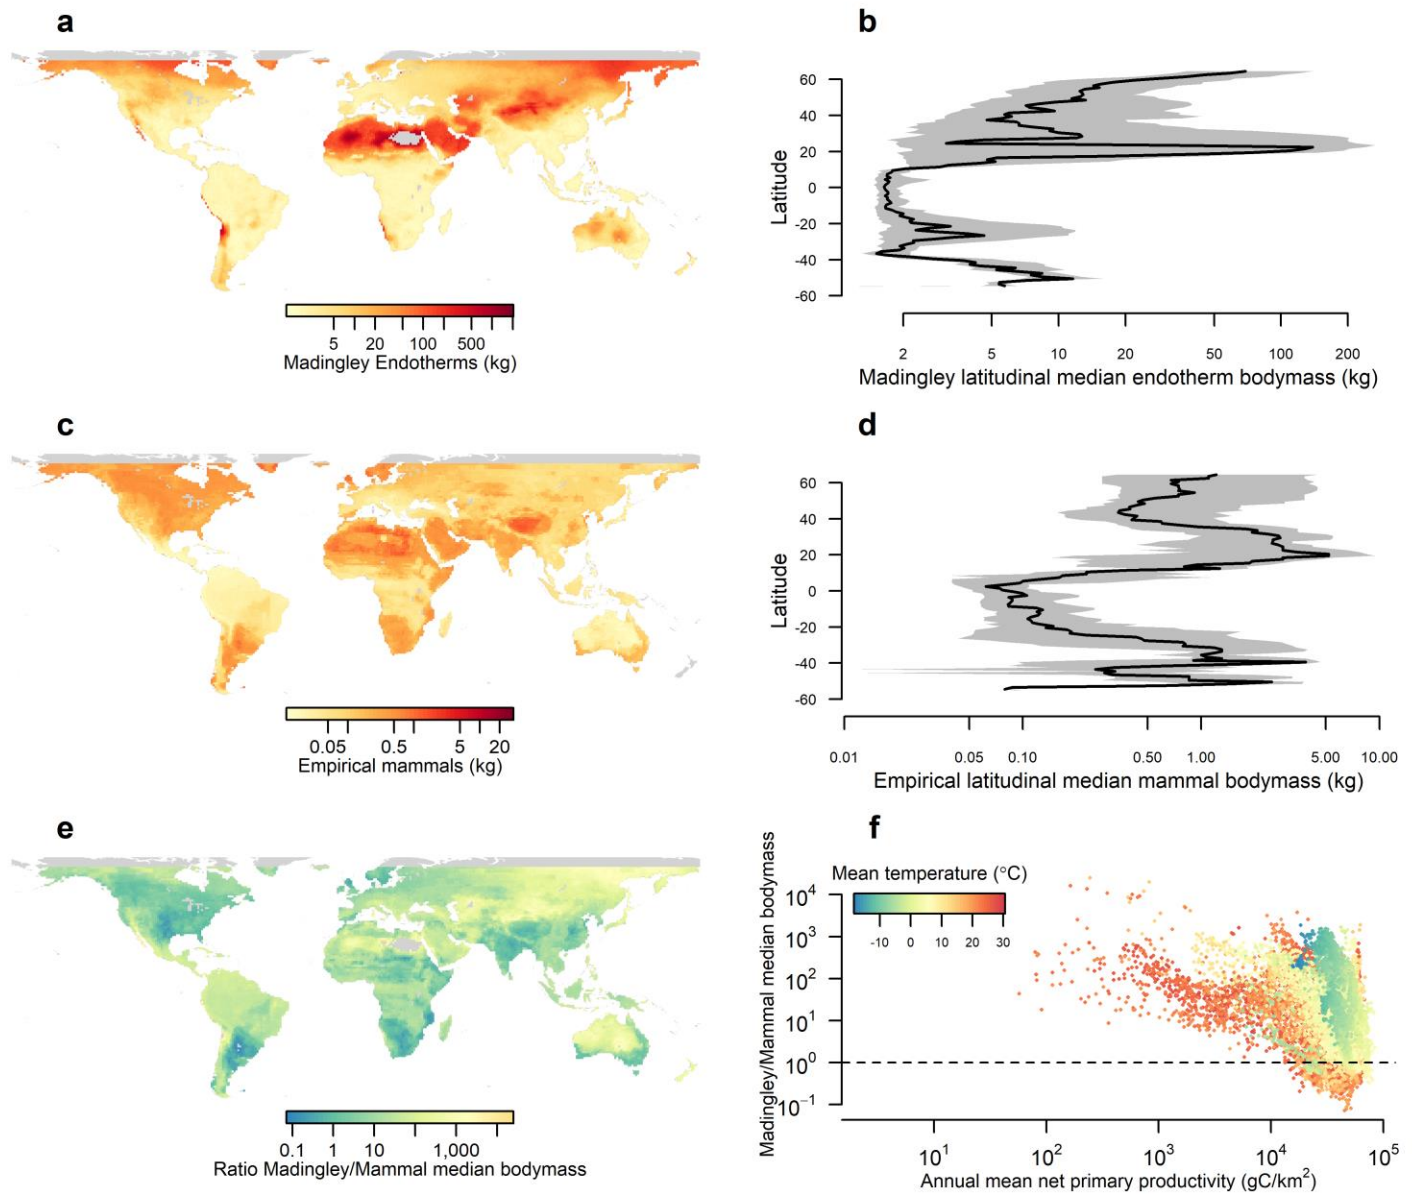

327 **Figure 1.** Global distributions (a, c) and latitudinal profiles (b, d) of ensemble median, annual mean,  
328 community median body masses of endotherms predicted by the Madingley model (a, b) and Holocene  
329 mammals estimated from empirical data (c, d). The ratio of Madingley to empirical estimates is plotted  
330 spatially (e) and the pixel values plotted as a function of the annual mean net primary productivity and  
331 coloured according to the annual mean temperature (f). Black line in b and d indicate the median body  
332 mass across each latitude band, whilst the grey shading indicates the interquartile range.  
333

### 334 **Comparing modelled and empirical body mass**

#### 335 *Endotherms*

336 Endotherms modelled by Madingley exhibit spatial variation in body mass that resembles empirical  
337 patterns (Figure 1a, c). Modelled body sizes increased in northern USA and Canada, south west Africa,  
338 the Sahara, and central Asia consistent with empirical patterns in mammals. Modelled and empirical body  
339 sizes were significantly, positively correlated at the global scale (Mammals:  $r = 0.38$ ,  $p < 1 \times 10^{-5}$ , modified  
340 t-test). The ratio of modelled and empirical body mass estimates shows many areas in the world with  
341 consistent absolute body mass values (Figure 1e). However, northeast Asia, central and western Australia  
342 stand out as showing disagreement. In these areas, the Madingley model suggests larger body masses than  
343 the east coast of Australia, whilst the empirical data for mammals suggest the opposite.

344

345 Latitudinal profiles show that Madingley predicts Bergmann-like clines that are similar in shape to those  
346 for Holocene mammals (Figure 1b, d). Body masses reached a minimum in the sub-tropics. They  
347 increased towards the highest latitudes but with peaks around the desert belt. Although modelled and  
348 empirical body masses are correlated, in general, the organisms predicted by Madingley were larger than  
349 those estimated from empirical data by about an order of magnitude.

350

351 There was a trend in the degree of agreement between modelled and empirical body mass estimates as a  
352 function of NPP (Figure 1f). As annual mean NPP decreased, Madingley tended to increasingly  
353 overestimate endotherm body mass. This relationship held across different temperature regimes.

354 Agreement was more likely in locations of higher NPP but there was nonetheless substantial variation in  
355 the ratio of modelled to empirically estimated body mass for high NPP locations even within similar  
356 annual mean temperature environments.

357

### 358 **Knockout experiments**

#### 359 *Environmental knockouts*

360 We found support for the resource availability drivers of body mass clines and in particular the seasonality  
361 of resource availability (Figure 2). When the latitudinal gradient in NPP was removed (NPP-flat, Table 2),  
362 endotherm body masses modestly but significantly decrease (negative proportional body mass deviation,  
363 with 95% interval below zero) across most latitudes, so there was little change in the body-mass clines  
364 (Figure S5). However, when we removed variation in NPP across the year (NPP-aseasonal), body masses  
365 declined significantly in high latitudes of the northern hemisphere, with an effect size that increased with  
366 increasing latitude. Changes were of smaller magnitude and less frequently significant in tropical latitudes  
367 with the result that body mass tended to decline with increasing latitude in the northern hemisphere, almost  
368 removing the conventional Bergmann clines (Figure S5). In both NPP-flat and NPP-aseasonal knockouts,  
369 the latitudinal median of the grid-cell median adult endotherm body mass was reduced (median declines of  
370 21% for NPP-flat and 27% for NPP-aseasonal; Figure 2). Removing variation in temperature across the  
371 year (T-aseasonal) caused body size declines in mid-latitudes in both hemispheres and had little effect in  
372 low latitudes. Effect sizes were smaller and less significant in the southern hemisphere for all knockouts.  
373 T-flat had little effect on endotherm body mass in the either hemisphere.  
374  
375 Ectotherms body mass tended to be greater in the tropics and decline with increasing northern latitude. In  
376 response to the knockouts, this body mass cline responded most to seasonality of resource availability and  
377 of thermoregulation. Ectotherm body masses clines were exacerbated when there was no seasonal variation  
378 in NPP (NPP-aseasonal) but reversed when there was no seasonal variation in temperature (T-aseasonal)  
379 (Figure 2 and Figure S5).



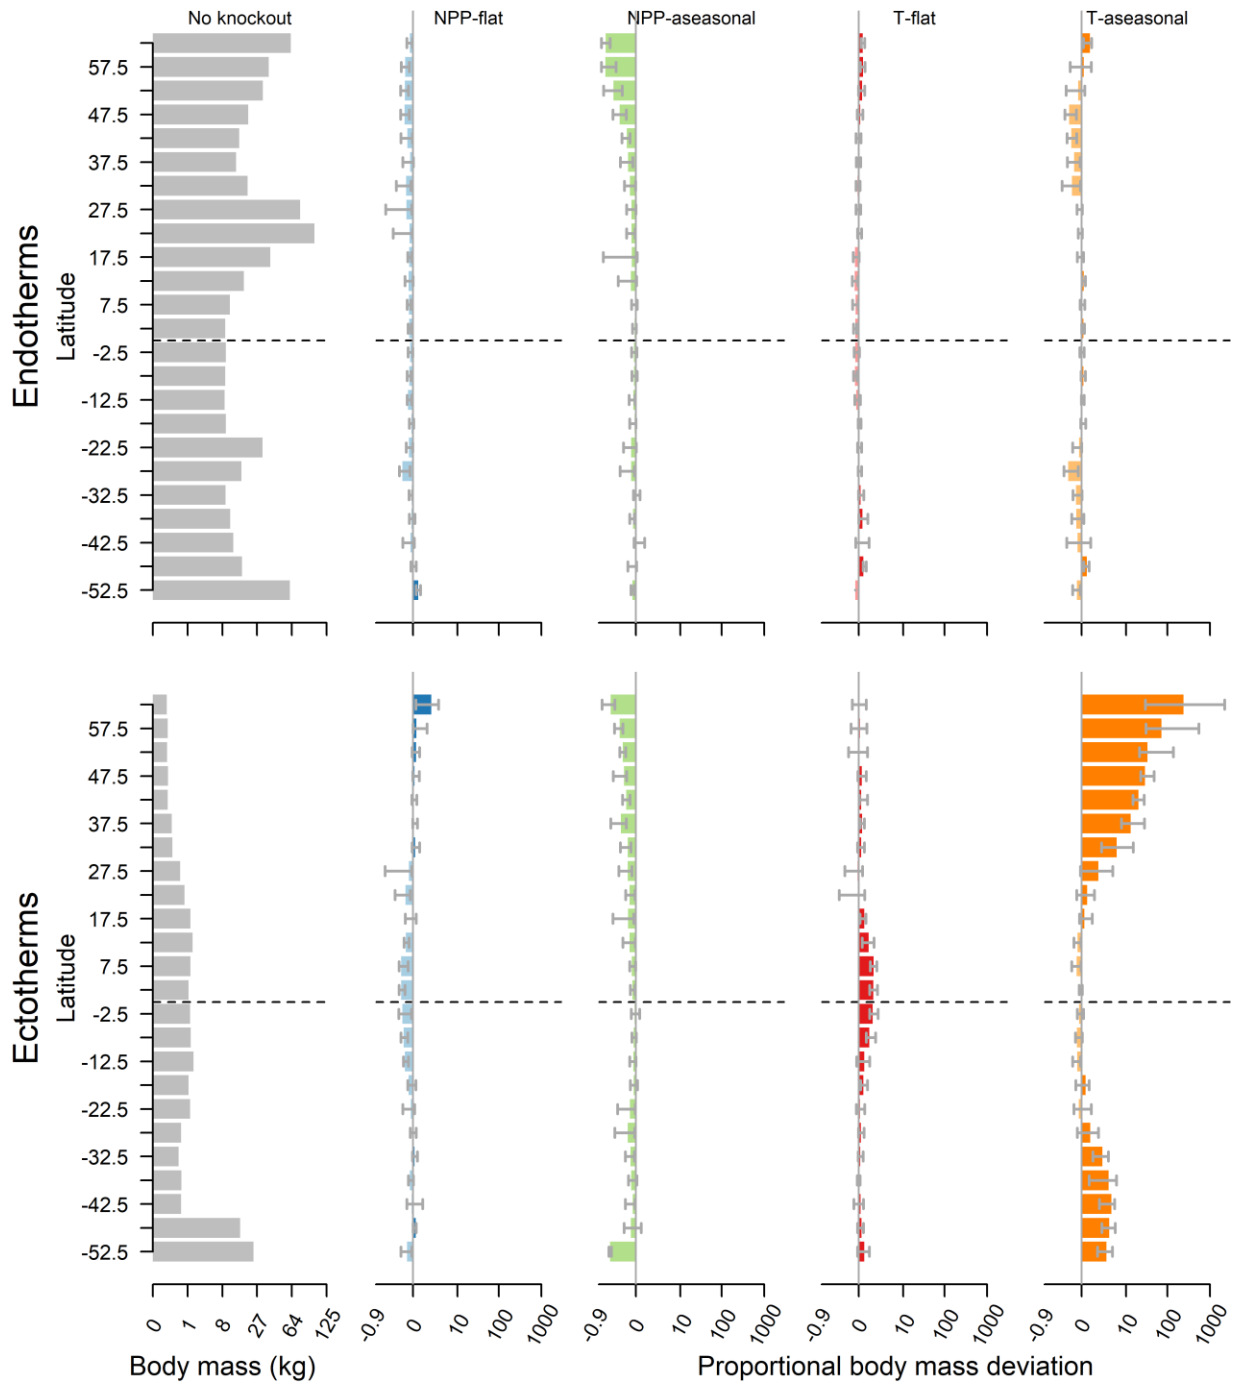

380

381 **Figure 2.** The relative effect on community mean endotherm and ectotherm body mass across latitudes of

382 removing spatial variation in cumulative annual primary production, seasonality of primary production,

383 annual mean temperature and annual temperature seasonality. Solid bars represent the median and grey

384 lines the interquartile range across longitudes with each latitude band. Lighter hue indicates negative  
385 median effect whilst darker indicates a positive median effect

386

387

388 *Exploring causation: Individual level ecological responses*

389 The results from a grid cell in North Asia (central Russia, 62.5°N, 82.5°E) showed that, for endotherms, in  
390 all knockouts other than T-flat, median body masses declined because smaller organisms persisted in the  
391 model (Figure 3a). NPP-aseasonal had the largest effect followed by T-aseasonal. In terms of differential  
392 effects on organisms of different body mass, smaller organisms tended to assimilate more biomass, produce  
393 more offspring and have lower starvation mortality losses relative to the full environment for all knockouts  
394 except T-flat (Figure 3b, S5).

395

396 For ectotherms, median body mass increased in all knockout simulations except the NPP-flat (Figure 4).  
397 The largest effects arose in the T-flat and T-aseasonal simulations. T-flat resulted in ectotherms with body  
398 mass less than 10g dying out, and orders of magnitude lower abundances of larger ectotherms. This arose  
399 because the interaction of warmer temperatures but with retained seasonality patterns reduced the period of  
400 the year in which ectotherms were active in the model. As a result, the likelihoods and rates of assimilation  
401 and reproduction were reduced and rates of starvation mortality were substantially elevated, especially for  
402 smaller ectotherms with a higher relative metabolic rate. T-aseasonal resulted in decreased abundance of  
403 the smallest, and an increase in the abundance of the largest, ectotherms. Ectotherms in this experiment  
404 were active all year round in the model (there was no unsuitable winter season) hence the probabilities and  
405 rates of assimilating or reproducing raised and reproductive output was increased, especially for smaller  
406 organisms.

407

19

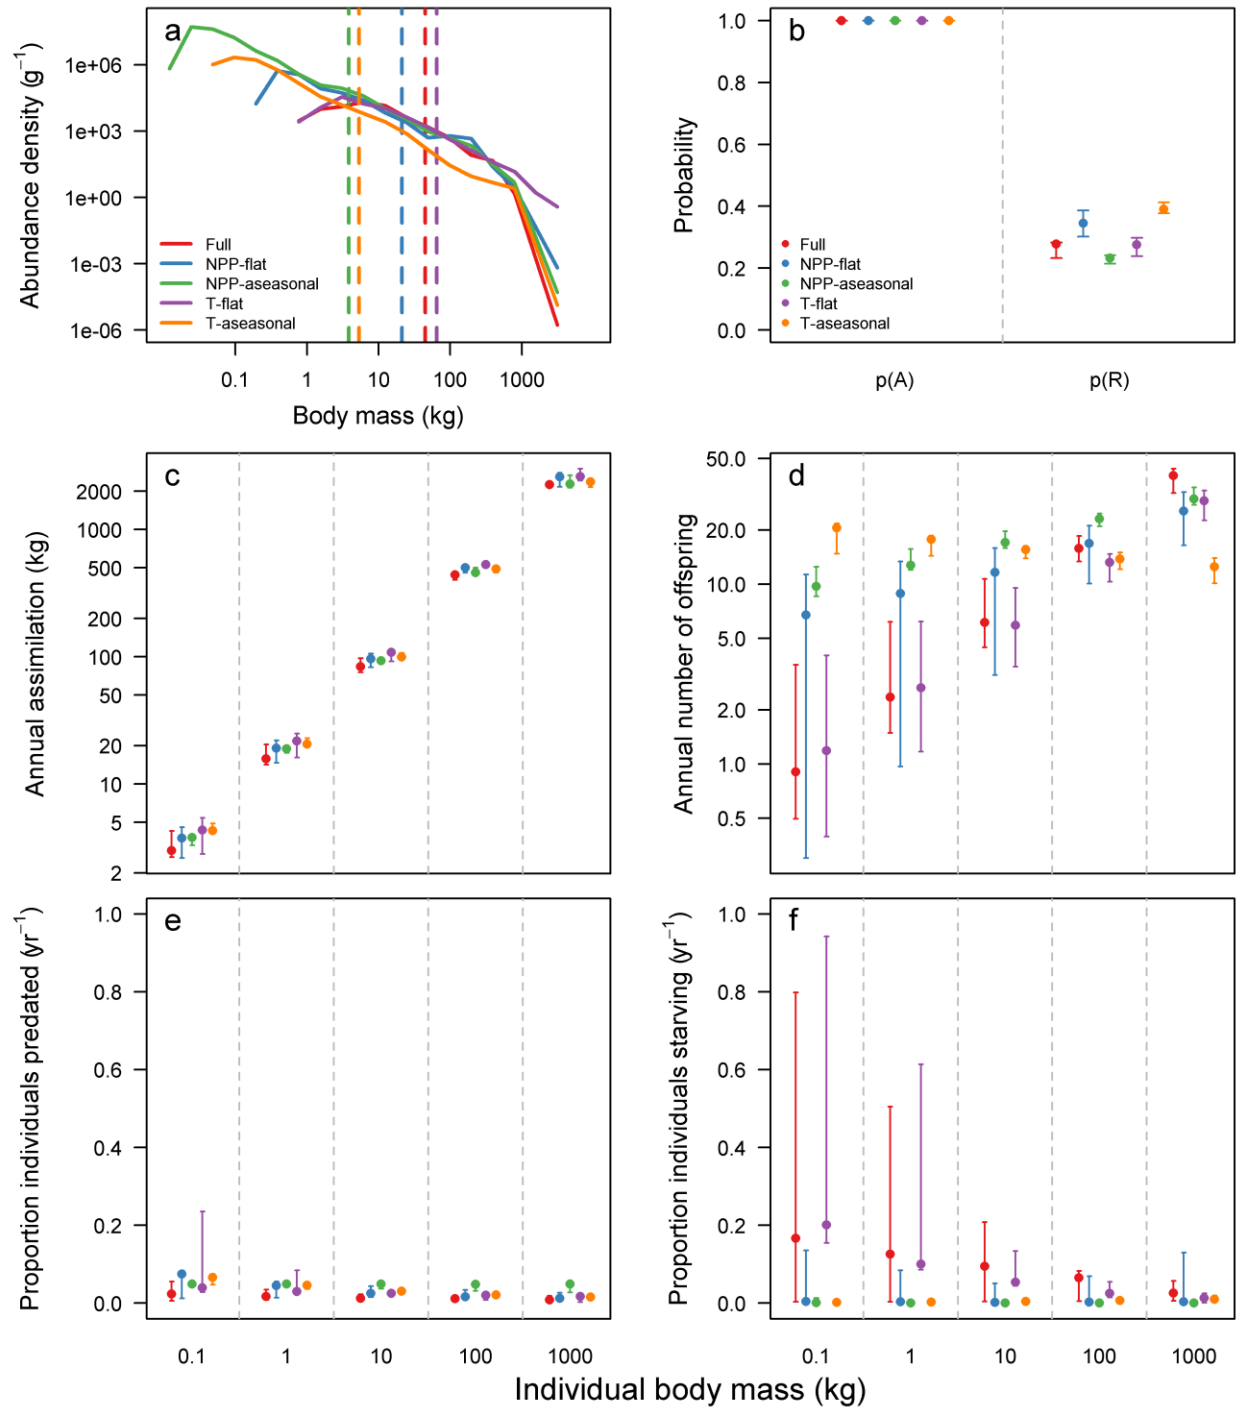

408

409 **Figure 3.** Effect of environmental knockouts in a grid cell centred at 62.5°N and 82.5°E on (a) endotherm  
410 community size distribution, (b) probability of assimilating biomass,  $p(A)$ , and of reproducing offspring,  
411  $p(R)$ , within a year, (c) annual mass assimilated, (d) number of offspring produced per individual present

412 at the start of the year, and proportion of individuals present at the start of the year that die from predation  
413 (e) or starvation (f) events. The community size distribution is the annual median abundance per mass bin  
414 from the 20<sup>th</sup> year of the simulation, dashed lines indicate the community mean body mass for each  
415 knockout. Points in b – f represent median predicted values from models fitted to annual data from the last  
416 5 years of a 20-year simulation, error bars represent maximum and minimum value across years.

417

418 The results from environmental knockouts in an equatorial ecosystem (2.5°N and 12.5°E) showed limited  
419 changes in the abundance size distribution of endotherms (Figures S6-S8). Conversely, for ectotherms, the  
420 median body mass decreased by five orders of magnitude in the T-aseasonal knockout. This was caused by  
421 the increased likelihood and rate of reproduction of smaller ectotherms but reduced output of larger  
422 ectotherms, compared to the full environment. Smaller ectotherms were also less likely to starve in the  
423 aseasonal temperature environment when compared to the full environment.

424

21

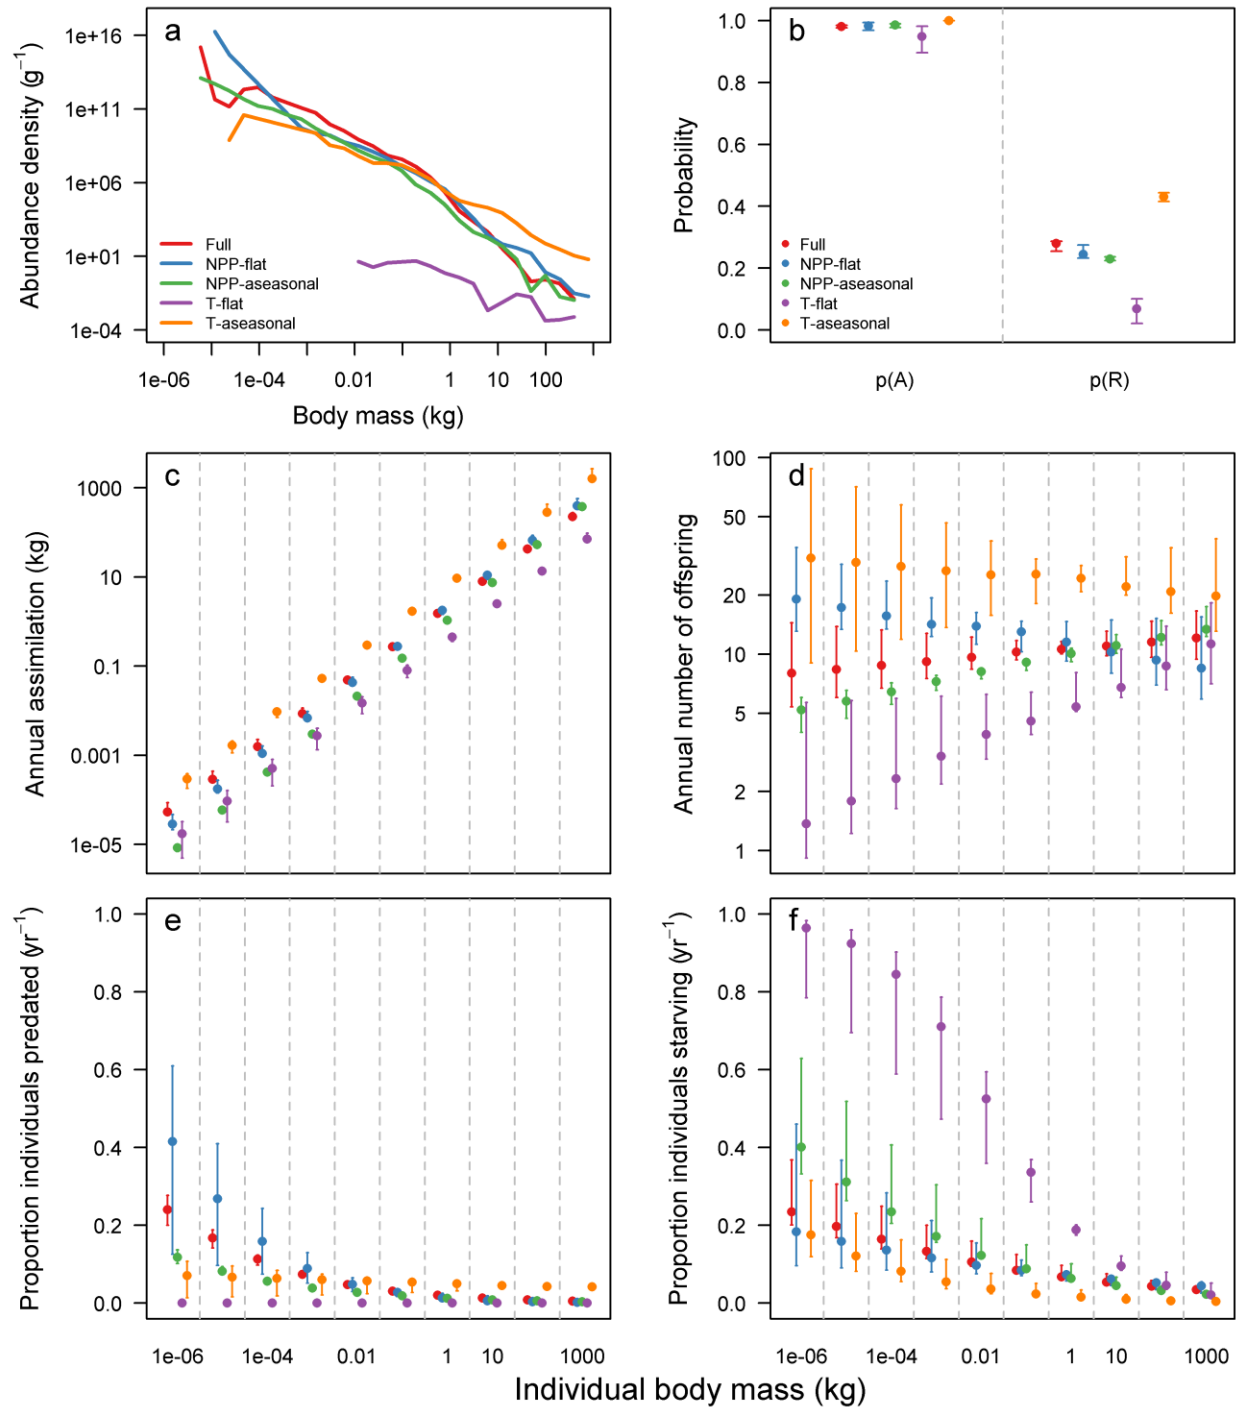

425

426 **Figure 4.** Effect of environmental knockouts in a grid cell centred at 62.5°N and 82.5°E on (a) ectotherm

427 community size distribution, (b) probability of assimilating biomass, p(A), and of reproducing offspring,

428 p(R), within a year, (c) annual mass assimilated, (d) number of offspring produced per individual present

429 at the start of the year, and proportion of individuals present at the start of the year that die from predation  
430 (e) or starvation (f) events. The community size distribution is the annual median abundance per mass bin  
431 from the 20<sup>th</sup> year of the simulation, dashed lines indicate the community mean body mass for each  
432 knockout. Points in b – f represent median predicted values from models fitted to annual data from the last  
433 5 years of a 20 year simulation, error bars represent maximum and minimum value across years.

434

## 435 **DISCUSSION**

436 Bergmann's rule is an ecological pattern for which there is a complex set of hypothesised mechanisms and  
437 varying levels of empirical support. The Madingley model is a general mechanistic model of whole  
438 ecosystems, it was not built to fit Bergmann cline data specifically, rather to model emergent patterns based  
439 on encoded ecology. Encouragingly, the model is able to generate global spatial and latitudinal patterns in  
440 body mass from individual organismal interactions that are consistent with empirical estimates. Attempting  
441 to unpick the variation in body-size attributed to different environmental and ecological drivers provides  
442 insight into the potential mechanisms underlying empirical observations. In general, the model captures  
443 endothermic patterns reasonably well. Madingley generally over-predicted the body size of organisms  
444 compared to empirical estimates. There are several possible factors that might contribute to this  
445 disagreement.

446 First, the median unique adult body masses for all cohorts in a grid cell is not equivalent to the median  
447 species mass. Because the cohorts in Madingley are hetero-specific, at present the model does not inform  
448 about how many species it might represent. A cohort of small endotherms in Madingley might represent  
449 many species with small body size. Whilst several cohorts of large organisms in Madingley, might represent  
450 intra-specific variation in a single species. Second, the empirical estimates have substantial associated  
451 uncertainties. For example, there can be considerable intraspecific variation in body size across ranges  
452 (Ashton, 2002; Clauss et al., 2013; Tseng and Soleimani Pari, 2019). The EOO maps assumes a species is  
453 found in every cell within its EOO at all times. Thirdly, the Madingley model might be missing mechanisms  
454 that limit the maximum size of organisms or increase the survival of smaller organisms. The current

455 formulation of the model misses several aspects of thermoregulatory behaviour. For example, ectotherms  
456 can behaviourally regulate their temperature above or below that of the ambient temperature (Kearney et  
457 al., 2009), a process not included in Madingley. So metabolic costs may be under-estimated in cold  
458 environments and over-estimated in hot environments. In addition, the model neglects hibernation, and so  
459 metabolic costs might be over-estimated in seasonal environments. Including such behaviours could alter  
460 the degree of converse Bergmann cline in the model but it is not clear in which direction. The model also  
461 currently assumes that thermoregulation in endotherms has a flat metabolic cost across latitudes and that  
462 there is no extra metabolic cost associated with, for example, fat deposits, feathers or fur to protect against  
463 cold temperatures. Since smaller endotherms pay a greater relative metabolic cost to thermoregulate against  
464 extreme temperatures than larger endotherms (Porter and Kearney, 2009), including this effect would likely  
465 amplify the latitudinal body mass gradients in the model. As a result of their possibly opposing effects and  
466 the complex community assembly processes operating through time, the net impact of including  
467 thermoregulatory effects on community body masses is not clear, but should be explored as these features  
468 are incorporated into the model. The tendency for the Madingley model to overpredict endotherm body size  
469 in lower productivity environments (Figure 1 e, f) provides evidence for missing mechanisms, such as  
470 hibernation, that permit smaller organisms to survive adverse conditions, or that prevent larger organisms  
471 outcompeting smaller ones, for example as a result of resources being inaccessible to larger organisms. The  
472 lack of three dimensional structure to the vegetation in the model is one example of the latter, arboreal  
473 mammals tend to be smaller bodied than ground-based mammals. An additional omission that might impact  
474 the largest body sizes in the model is the absence of pack hunting, which would enable predators to predate  
475 on larger prey, whilst currently predators are generally larger than their prey organisms.

476

477 More generally, the patterns that emerge from the model will be sensitive to uncertainties in the model  
478 structure (which ecological processes are represented and how they are formulated) and the  
479 parameterisation of these functional forms. Exploring this sensitivity should be a critical next step, as this  
480 would permit an exploration of the generality of macroecological mechanisms responsible for Bergmann

481 clines. Notwithstanding this caveat, the results from the current, published and evaluated version of the  
482 model results provide support for the role of both thermoregulation and resource availability mechanisms,  
483 and particularly the seasonality of these, as key mechanisms determining body mass of both endotherms  
484 and ectotherms.

485

486 Despite being hugely simplified in comparison to reality and attempting to model all ecosystems on land at  
487 the level of individual organisms, the fundamental ecological mechanisms currently included in the  
488 Madingley model produce plausibly realistic emergent geographic pattern of median endotherm body mass.  
489 It also captures much of the variation of median body mass within each latitudinal band. For example, desert  
490 regions are known as prominent sites of large body mass for birds and mammals (Blackburn and Hawkins,  
491 2004; Olson et al., 2009; Morales-Castilla et al. 2012a), and this is produced by the model outputs. The  
492 Saharan and Gobi deserts all harbour greater median animal body mass than the median of their respective  
493 latitudes (Figure 1).

494

495 We tested hypotheses on the mechanistic factors behind observed patterns through knock-out experiments  
496 for environmental factors. The initial conditions of the model are spatially neutral, meaning that there is no  
497 initial spatial pattern in the types of cohorts seeded in each grid cell. Therefore, the model does not require  
498 chance or mechanisms of migration ability or historical contingencies to generate body mass gradients (see  
499 e.g. Morales-Castilla et al. 2012b), implying that while these hypothesised mechanisms may be responsible,  
500 Bergmann's clines can be produced without them. There is no *a priori* latitudinal variation in predation risk  
501 in the model, therefore this mechanism is also not required for the emergent body mass patterns (Wolverton  
502 et al., 2009). Our results suggest that thermoregulation and resource availability are dominant direct controls  
503 on endotherm community mean body mass, they as when these factors are removed, or “knocked out”, from  
504 the model, endotherm body mass across latitudes declines more than for other factors. Where productivity  
505 increased or the seasonality of productivity was removed, the severity of the seasonal cycling of food  
506 surplus and deficit (sensu Geist, 1987) was reduced, allowing smaller organisms that are more susceptible



507 to starvation, to avoid this risk and increase their fecundity. The resulting abundance increase of smaller  
508 endotherms thus draws the community mean body mass down and also exerts some bottom up control over  
509 larger endotherms, which have higher starvation rates and lower reproduction rates than the full  
510 environment simulations.

511  
512 For modelled ectotherms, thermoregulation is the dominant control on community body mass through its  
513 effect on enabling access to resources. This is because ectotherm activity is limited under extreme ambient  
514 temperatures. In simulations that isolated the seasonality of productivity from that of temperature (NPP-  
515 aseasonal vs T-aseasonal), the altered seasonal cycling of food surplus and deficit appears unimportant if  
516 the temperature remains seasonal such that the organism's ability to use those resources is impeded.

517  
518 General Ecosystem Models, such as the Madingley model, can generate 'in-silico' global ecosystems that  
519 can be experimentally manipulated in ways that are impossible in the real world – allowing for novel  
520 explorations in 'mechanistic macroecology'. Our study demonstrates this for Bergmann's rule, and provides  
521 support for the thermoregulation and resource availability hypotheses, while also generating an entirely  
522 new hypothesis of trophic interactions between ectotherms and endotherms as a potential structuring  
523 mechanism for observed clines in endotherm body mass. While 'mechanistic macroecology' cannot be the  
524 only solution or approach to unpicking global macroecological patterns, our study suggests that it is a tool  
525 that should be investigated further beyond these preliminary explorations, and can provide both ecological  
526 insight and identify model weaknesses or missing processes. Furthermore, our finding of a bottom up  
527 control of endotherm body mass by ectotherms suggest that we must model ecosystems and biological  
528 interactions holistically to better capture how they are structured and function.

529

530

531

532 **REFERENCES**

- 533 Adams, D.C. and Church, O.C. (2008) Amphibians do not follow Bergmann's rule. *The Society for the*  
534 *Study of Evolution*, 62 (2), 413-420.
- 535 Angilletta, Jr., M.J., Niewiarowski, P.H., Dunham, A.E., Leache, A.D. and Porter, W.P. (2004)  
536 Bergmann's Clines in Ectotherms: Illustrating a Life-History Perspective with Sceloporine Lizards.  
537 *The American Naturalist*, 164 (4), 168-183.
- 538 Arendt, J.D. (2011) Size-fecundity relationships, growth trajectories, and the temperature-size rule for  
539 ectotherms. *Evolution*, 65 (1), 43-51.
- 540 Ashton, K.G. (2002) Patterns of within-species body size variation of birds: strong evidence for  
541 Bergmann's rule. *Global Ecology and Biogeography*, 11, 505-523.
- 542 Ashton, K.G. and Feldmann, C.R. (2003) Bergmann's rule in nonavian reptiles: turtles follow it, lizards  
543 and snakes reverse it. *Evolution*, 57 (5), 1151-1163.
- 544 Ashton, K.G., Tracy, M.C. and de Queiroz, A. (2000) Is Bergmann's Rule Valid for Mammals? *The*  
545 *American Naturalist*, 156 (4), 390-415.
- 546 Atkinson, D. (1994) Temperature and organism size: a biological law for ectotherms? *Advances in*  
547 *Ecological Research*, 25, 1-58.
- 548 Bergmann, K. (1847). Ueber die verhältnisse der warmeökonomie der thiere zu ihrer grosse. *Göttinger*  
549 *Studien*, 3, 595–708.
- 550 BirdLife International & NatureServe. (2017). Bird species distribution maps of the world. BirdLife  
551 International, Cambridge, United Kingdom and NatureServe, Arlington, United States.
- 552 Blackburn, T.M. and Gaston, K.J. (1996) Spatial patterns in the body sizes of birds species in the New  
553 World. *Oikos*, 77, 436-446.
- 554 Blackburn, T.M. and Hawkins, B.A. (2004) Bergmann's rule and the mammal fauna of northern North  
555 America. *Ecography*, 27, 715-724.
- 556 Blackburn, T.M., Gaston, K.J. and Loder, N. (1999) Geographic gradients in body size: a clarification of  
557 Bergmann's rule. *Diversity and Distributions*, 5, 165-174.

- 558 Boyce, M. S. (1978) Climatic variability and body size variation in the muskrats (*Ondatra zibethicus*) of  
559 North America, *Oecologia* 36: 1-20.
- 560 Boyce, M. S (1979) Seasonality and patterns of natural selection for life histories, *The American*  
561 *Naturalist*, 114: 569-583.
- 562 Cabral, J.S., Valente, L., and Hartig, F. (2017) Mechanistic simulation models in macroecology and  
563 biogeography: state-of-art and prospects. *Ecography*, 40, 267-280.
- 564 Cardillo, M. (2002) Body Size and Latitudinal Gradients in Regional Diversity of New World Birds.  
565 *Global Ecology and Biogeography*, 11 (1), 59-65.
- 566 Clauss, M., Dittmann, M.T., Müller, D.W.H., Meloro, C. & Codron, D. (2013) Bergmann's rule in  
567 mammals: a cross-species interspecific pattern. *Oikos*, 122, 1465–1472.
- 568 Connolly, S.R., Keither, S.A., Colwell, R.K. and Rahbek, C. (2017) Process, Mechanism, and Modelling  
569 in Macroecology. *Trends in Ecology and Evolution*, DOI: dx.doi.org/10.1016/j.tree.2017.08.011
- 570 Cooper, N., and A. Purvis (2010). Body size evolution in mammals: complexity in tempo and mode.  
571 *American Naturalist* 175:727–738.
- 572 Cushman, J.H., Lawton, J.H. and Manly, B.F.J. (1993) Latitudinal patterns in Europe ant assemblages:  
573 variation in species richness and body size. *Oecologia*, 95, 30-37.
- 574 Cvetkovic, D., Tomasevic, N., Ficetola, G.F., Crnobrnja-Isailovic, J. and Miaud, C. (2009) Bergmann's  
575 rule in amphibians: combining demographic and ecological parameters to explain body size  
576 variation among populations in the common toad *Bufo bufo*. *Journal of Zoological System*  
577 *Evolution Research*, 47 (2), 171-180.
- 578 Diniz-Filho, J.A.F., Bini, L.M., Rodriguez, M.A., Rangel, T.F.L.V.B. and Hawkins, B.A. (2007) Seeing  
579 the forest for the trees: partitioning ecological and phylogenetic components of Bergmann's rule in  
580 European Carnivora. *Ecography*, 30, 598-608.
- 581 Dormann, C., M. McPherson, J., B. Araújo, M., Bivand, R., Bolliger, J., Carl, G., G. Davies, R., Hirzel,  
582 A., Jetz, W., Daniel Kissling, W. and Kühn, I. (2007) Methods to account for spatial  
583 autocorrelation in the analysis of species distributional data: a review. *Ecography*, 30(5), 609-628.

- 584 Dutilleul, P., Pelletier, B., and Fyles, J.W. (2008) Modified F-tests for assessing the multiple correlation  
585 between one spatial process and several others. *Journal of Statistical Planning and Inference*, 138,  
586 1402-1415.
- 587 Geist, V. (1987) Bergmann's rule is invalid. *Canadian Journal of Zoology*, 65, 1035-1038.
- 588 Faurby, S. and Araujo, M.B. (2017) Anthropogenic impacts weaken Bergmann's Rule. *Ecography*, 40,  
589 683-684.
- 590 Faurby S, Davis M, Pedersen R, Schowanek S, Antonelli A, Svenning JC (2018). PHYLACINE 1.2: The  
591 phylogenetic atlas of mammal macroecology *Ecology* 99:2626
- 592 Faurby S, Svenning JC (2016) Resurrection of the island rule – human-driven extinctions have ob-scured  
593 a basic evolutionary pattern. *American Naturalist* 187: 812-820
- 594 Faurby, S. and Svenning, J.-C. (2015) Historic and prehistoric human-driven extinctions have reshaped  
595 global mammal diversity patterns. *Diversity and Distributions*, 21, 1155-1166.
- 596 Feldman, A. and Mieri, S. (2014) Australian Snakes Do Not Follow Bergmann's Rule. *Evolutionary*  
597 *Biology*, 41, 327-335.
- 598 Feldman, A., Sabath, N., Pyron, R. A., Mayrose, I. and Meiri, S. (2016) Body-sizes and diversification  
599 rates of lizards, snakes, amphisbaenians and the tuatara. *Global Ecology and Biogeography*, 25:  
600 187-197
- 601 Ferguson, S.H. and Lariviere, S. (2008) How Social Behaviour Links Environment and Body Size in  
602 Mammalian Carnivores. *The Open Ecology Journal*, 1, 1-7.
- 603 Freckleton, R.P., Harvey, P.H. and Pagel, M. (2003) Bergmann's Rule and Body Size in Mammals. *The*  
604 *American Naturalist*, 161 (5), 821-825.
- 605 Gaston, K.J. (2000) Global patterns in biodiversity. *Nature*, **405**, 220–7.
- 606 Geiser, F., 2013. Hibernation. *Current Biology*, 23(5), pp.R188-R193.
- 607 Geist, V., (1987) Bergmann's rule is invalid. *Canadian Journal of Zoology*, 65(4), 1035-1038.
- 608 Hamilton, T.H. (1961) The adaptive significance of intraspecific trends in wing length and body size  
609 among bird species. *Evolution*, 15, 180-195.

- 610 Harfoot, M.B.J., Newbold, T., Tittensor, D.P., Emmott, S., Hutton, J., Lyutsarev, V., Smith, M.J.,  
611 Scharlemann, J.P.W., Purves, D.W. (2014) Emergent Patterns of Ecosystem Structure and Function  
612 from a Mechanistic General Ecosystem Model. *PLoS Biology*, 12 (4): e1001841.  
613 doi:10.1371/journal.pbio.1001841.
- 614 Hawkins, B.A. and Diniz-Filho, J.A. (2006) Beyond Rapoport's rule: evaluating range size patterns of  
615 New World birds in a two-dimensional framework. *Global Ecology and Biogeography*, 15, 461-  
616 469.
- 617 Hijmans, R.J., S.E. Cameron, J.L. Parra, P.G. Jones and A. Jarvis (2005) Very high resolution  
618 interpolated climate surfaces for global land areas, *International Journal of Climatology*, 25, 1965-  
619 1978.
- 620 Ho, C-K., Pennings, S.C. and Carefoot, T.H. (2010) Is diet quality an overlooked mechanism for  
621 Bergmann's rule? *American Naturalist*, 175, 269-276.
- 622 Hurlbert, A.H. & Jetz, W. (2007) Species richness, hotspots, and the scale dependence of range maps in  
623 ecology and conservation. *Proceedings of the National Academy of Sciences*, 104, 13384–13389.
- 624 Huston, M.A. and Wolverton, S. (2011) Regulation of animal size by eNPP, Bergmann's rule, and related  
625 phenomena. *Ecological Monographs*, 81 (3), 349-405.
- 626 IUCN. (2017). Red List of threatened species v 17.3, <<http://www.iucnredlist.org>>. Downloaded in  
627 December 2017.
- 628 IUCN. (2016). IUCN red list of threatened species. Version 2016-3. <http://www.iucnredlist.org>
- 629 James, F.C. (1970) Geographic Size Variation in Birds and Its Relationship to Climate. *Ecology*, 51 (3),  
630 365-390.
- 631 Jones, K.E., Bielby, J., Cardillo, M., Fritz, S.A., O'Dell, J., Orme, C.D.L., Safi, K., Sechrest, W., Boakes,  
632 E.H., Carbone, C. and Connolly, C. (2009). PanTHERIA: a species-level database of life history,  
633 ecology, and geography of extant and recently extinct mammals: Ecological Archives E090-184.  
634 *Ecology*, 90(9), pp.2648-2648.

- 635 Kearney, M., Shine, R., and Porter, W. P. (2009). The potential for behavioral thermoregulation to buffer  
636 “cold-blooded” animals against climate warming. *Proceedings of the National Academy of*  
637 *Sciences*, 106(10), 3835–3840.
- 638 Lindsay, C.C (1966) Body sizes of poikilotherm vertebrates at different latitudes. *Evolution*, 20, 456-465.
- 639 Lukin, E.I. (1940) *Darvinizm i geograficheskie zakonomernosti v izmenenii organizmov* (Darwinism and  
640 Role of Geographical Patterns of Changes in Organisms), Moscow: Akad. Nauk
- 641 Marquet, P.A., Allen, A.P., Brown, J.H., Dunne, J.A., Enquist, B.J., Gillooly, J.F., Gowaty, P.A., Green,  
642 J.L., Harte, J., Hubbell, S.P. and O’dwyer, J. (2014) On theory in ecology. *BioScience*, 64(8),  
643 pp.701-710.
- 644 Martinez, P.A., Marti, D.A., Molina, W.F. and Bidau, C.J. (2013) Bergmann’s rule across the equator: a  
645 case study in *Cerdocyon thous* (Canidae). *Journal of Animal Ecology*, doi: 10.1111/1365-  
646 2656.12076.
- 647 Mayr, E. (1956) Geographical character gradients and climatic adaptation. *Evolution*, 10, 105-108.
- 648 McNab, B.K. (1971) On the ecological significance of Bergmann’s rule. *Ecology*, 52, 845-854.
- 649 McNab, B.K. (2010) Geographic and temporal correlations of mammalian size reconsidered: a resource  
650 rule. *Oecologia*, 164, 13-23.
- 651 Medina, A.I., Martí, D.A. and Bidau, C.J. (2007) Subterranean rodents of the genus *Ctenomys*  
652 (Caviomorpha, Ctenomyidae) follow the converse to Bergmann's rule. *Journal of Biogeography*,  
653 34(8), pp.1439-1454.
- 654 Meiri, S. (2011) Bergmann’s Rule - what’s in a name? *Global Ecology and Biogeography*, 20, 203-207.
- 655 Meiri, S. and Dayan, T. (2003) On the validity of Bergmann’s rule. *Journal of Biogeography*, 30, 331-  
656 351.
- 657 Meiri, S., Dayan, T. and Simberloff, D. (2004) Carnivores, biases and Bergmann’s rule. *Biological*  
658 *Journal of the Linnean Society*, 81, 579-588.
- 659 Meiri, S. and Thomas, G.H. (2007) The geography of body size - challenges of the interspecific approach.  
660 *Global Ecology and Biogeography*, 16, 689-693.

- 661 Morales-Castilla, I., Rodriguez, M.A. and Hawkins, B.A. (2012a) Deep phylogeny, net primary  
662 productivity, and global body size gradient in birds. *Biological Journal of the Linnean Society*, 106,  
663 880-892.
- 664 Morales-Castilla, I., Olalla-Tárraga, M.Á., Purvis, A., Hawkins, B.A. & Rodríguez, M.Á. (2012b) The  
665 imprint of Cenozoic migrations and evolutionary history on the biogeographic gradient of body size  
666 in New World mammals. *The American Naturalist*, 180, 246-256.
- 667 Mosseau, T.A. (1997) Ectotherms follow the converse to Bergmann's rule. *Evolution*, 51 (2), 630-632.
- 668 Olalla-Tarraga, M.A. (2011) "Nullis in Bergmann" or the pluralistic approach to ecogeographic rules: a  
669 reply to Watt et al. (2010). *Oikos*, 120, 1441-1444.
- 670 Olalla-Tarraga, M.A. and Rodriguez, M.A. (2007) Energy and interspecific body size patterns of  
671 amphibian faunas in Europe and North America: anurans follow Bergmann's rule, urodeles its  
672 converse. *Global Ecology and Biogeography*, 16, 606-617.
- 673 Olalla-Tarraga, M.A., Rodriguez, M.A. and Hawkins, B.A. (2006) Broad-scale patterns of body size in  
674 squamate reptiles of Europe and North America. *Journal of Biogeography*, 33, 781-793.
- 675 Oliveira, B.F., São-Pedro, V.A., Santos-Barrera, G., Penone, C. and Costa, G.C. (2017) AmphiBIO, a  
676 global database for amphibian ecological traits. *Scientific Data*, 4, p.sdata2017123.
- 677 Olson, V.A., Davies, R.G., Orme, D.L., Thomas, G.H., Meiri, S., Blackburn, T.M., Gaston, K.J., Owens,  
678 I.P.F. and Bennett, P.M. (2009) Global biogeography and ecology of body size in birds. *Ecology*  
679 *Letters*, 12, 249-259.
- 680 Pincheria-Donoso, D., Hodgson, D.J. and Tregenza, T. (2008) The evolution of body size under  
681 environmental gradients in ectotherms: why should Bergmann's rule apply to lizards? *BMC*  
682 *Evolutionary Biology*, 8:68 doi:10.1186/1471-2148-8-68
- 683 Pincheria-Donoso, D. (2010) The balance between predictions and evidence and the search for universal  
684 macroecological patterns: taking Bergmann's rule back to its endothermic origin. *Theory of*  
685 *Bioscience*, 129, 247-253.



- 686 Pincheria-Donoso, D. and Mieri, S. (2013) An Intercontinental Analysis of Climate-Driven Body Size  
687 Clines in Reptiles: No Support for Patterns, No Signals of Processes. *Evolutionary Biology*, 40,  
688 562-578.
- 689 Porter, W.P. and Kearney, M. (2009) Size, shape, and the thermal niche of endotherms, *Proceedings of*  
690 *the National Academy of Sciences*, 106, 19666-19672.
- 691 Purves, D., Scharlemann, J., Harfoot, M., Newbold, T., Tittensor, D.P., Hutton, J., Emmott, S. (2013)  
692 Time to model all life on Earth. *Nature*, 493, 295-297.
- 693 Ramirez, L., Diniz-Filho, J.A.F. and Hawkins, B.A. (2008) Partitioning phylogenetic and adaptive  
694 components of the geographical body-size pattern of New World birds. *Global Ecology and*  
695 *Biogeography*, 17, 100-110.
- 696 Rapacciuolo, G., Marin, J., Costa, G.C., Helmus, M.R., Behm, J.E., Brooks, T.M., Hedges, S.B.,  
697 Radeloff, V.C., Young, B.E. and Graham, C.H. (2017) The signature of human pressure history on  
698 the biogeography of body mass in tetrapods. *Global Ecology and Biogeography*, 26(9), pp.1022-  
699 1034.
- 700 Rensch, B. (1938) Some problems of geographical variation and species-formation. *Proceeds of the*  
701 *Linnean Society of London*, 150, 275-285.
- 702 Rodriguez, M.A., Lopez-Sanudo, I.L. and Hawkins, B.A. (2006) The geographic distribution of mammal  
703 body size in Europe. *Global Ecology and Biogeography*, 15, 173-181.
- 704 Rodriguez, M.A., Olalla-Tarraga, M.A., and Hawkins, B.A. (2008) Bergmann's rule and the geography of  
705 mammal body size in the Western Hemisphere. *Global Ecology and Biogeography*, 17, 274-283.
- 706 Rosenzweig, M.L (1968) The strategy of body size in mammalian carnivores. *American Midland*  
707 *Naturalist*, 80, 299-315.
- 708 Santini, L., González-Suárez, M., Rondinini, C. and Di Marco, M. (2017b) Shifting baseline in  
709 macroecology? Unravelling the influence of human impact on mammalian body mass. *Diversity*  
710 *and Distributions*, 23(6), 640-649.



- 711 Slavenko, A., Tallwin, O.J., Itescu, Y., Raia, P. and Meiri, S. (2016) Late Quaternary reptile extinctions:  
712 size matters, insularity dominates. *Global Ecology and Biogeography*, 25(11), 1308-1320.
- 713 Slavenko, A., Feldman, A., Allison, A., Bauer, A.M., Böhm, M., Chirio, L., Colli, G.R., Das, I., Doan,  
714 T.M., LeBreton, M. and Martins, M. (2019) Global patterns of body size evolution in squamate  
715 reptiles are not driven by climate. *Global Ecology and Biogeography*, 28(4), pp.471-483.
- 716 Smith, F. A., S. K. Lyons, S. Ernest, K. Jones, D. Kaufman, T. Dayan, P. Marquet, J. Brown, and J.  
717 Haskell. 2003. Body mass of late quaternary mammals. *Ecology* 84:3403
- 718 Smith, M.J., Purves, D.W., Lyutsarev, V. and Emmott, S. (2013) The climate dependence of the terrestrial  
719 carbon cycle, including parameter and structural uncertainties. *Biogeosciences*, 10(1), 583.
- 720 Sunday, J.M., Bates, A.E. and Dulvy, N.K. (2010) Global analysis of thermal tolerance and latitude in  
721 ectotherms. *Proceedings of the Royal Society B: Biological Sciences*, 278(1713), pp.1823-1830.
- 722 Terribile, L.C., Olalla-Tarraga, M.A., Diniz-Filho, J.A.F. and Rodriguez, M.A. (2009) Ecological and  
723 evolutionary components of body size: geographic variation of venomous snakes at the global  
724 scale. *Biological Journal of the Linnean Society*, 98, 94-109.
- 725 Torres-Romero, E.J., Morales-Castilla, I., & Olalla-Tárraga M.Á. (2016) Bergmann's rule in the oceans?  
726 Temperature determines global interspecific patterns of body size in marine mammals. *Global  
727 Ecology and Biogeography*, 25: 1206-1215.
- 728 Tseng, M. and Soleimani Pari, S. (2019) Body size explains interspecific variation in size-latitude  
729 relationships in geographically widespread beetle species. *Ecological entomology*, 44(1), pp.151-  
730 156.
- 731 Vinarski, M.V. (2014) On the Applicability of Bergmann's Rule to Ectotherms: The State of the Art.  
732 *Biology Bulletin Reviews*, 4 (3), 232-242.
- 733 Watt, C., Mitchell, S. and Salewski, V. (2010) Bergmann's rule; a concept cluster? *Oikos*, 119, 89-100.
- 734 Watt, C. and Salewski, V. (2012) Bergmann's rule encompasses mechanism: a reply to Olalla-Tarraga  
735 (2011). *Oikos*, 120, 1445-1447.

736 Wilman, H., Belmaker, J., Simpson, J., de la Rosa, C., Rivadeneira, M.M. and Jetz, W. (2014) EltonTraits  
737 1.0: Species-level foraging attributes of the world's birds and mammals. *Ecology*, 95(7), pp.2027-  
738 2027.

739 Wolverton, S., Huston, M.A., Kennedy, J.H, Cagle, K. and Cornelius, J.D (2009) Conformation to  
740 Bergmann's Rule in White-tailed Deer can be Explained by Food Availability. *American Midland*  
741 *Naturalist*, 162, 403-417.

742

743

744

#### 745 **DATA ACCESSIBILITY**

746 All modelled body mass data has been deposited in Data Dryad (DOI to be added on acceptance). Empirical  
747 data are accessible from the cited sources.

## Tables

**Table 1. Hypothesised mechanisms contributing to the latitudinal gradients in animal body size.**

| <b>Mechanism</b>             | <b>Description</b>                                                                                                                                                                                                                                                                                                                                                                                                                                                                                     |
|------------------------------|--------------------------------------------------------------------------------------------------------------------------------------------------------------------------------------------------------------------------------------------------------------------------------------------------------------------------------------------------------------------------------------------------------------------------------------------------------------------------------------------------------|
| <i>Chance</i>                | Random ancestral colonisation and subsequent diversification may have led to larger body masses at higher latitudes (Blackburn et al., 1999). Alternatively, selective advantages of traits coupled with body mass may cause the pattern.                                                                                                                                                                                                                                                              |
| <i>Migration ability</i>     | Smaller species are associated with lower dispersal abilities. The different dispersal velocities of larger and smaller bodied species during the retreat of the late Pleistocene ice sheet therefore results in underrepresentation of smaller species in areas from which ice has retreated (Blackburn and Gaston, 1996; Olalla-Tárraga and Rodríguez, 2007; Morales-Castilla et al., 2012a,b; Martinez et al., 2013).                                                                               |
| <i>Predation</i>             | Predation risk appears to decrease with distance from the equator. This allows species at high latitude to mature to a larger size (Ashton et al., 2000).                                                                                                                                                                                                                                                                                                                                              |
| <i>Thermoregulation</i>      | If animals are the same shape, larger species have increased heat conservation in cooler environments thereby augmenting survival and energy allocation to growth (Bergmann, 1847).                                                                                                                                                                                                                                                                                                                    |
| <i>Resource availability</i> | Body mass must be maintained by a sufficient supply of food resources (Rosenzweig, 1968). This supply is governed by net primary productivity (NPP) and competition for resources. Geist (1987) first argued that NPP increases with latitude whilst competition decreases, permitting larger body size at higher latitudes, peaking at 60 - 65° (Wolverton et al., 2009; McNab, 2010; Huston and Wolverton, 2013). Ho et al. (2010) have also asserted that resource quality increases with latitude. |
| <i>Habitat availability</i>  | Larger animals generally need larger habitats. Increased habitat fragmentation in the tropics as a result of concentrated mesoclimate gradients causes unsuitable conditions for larger species (Hawkins and Diniz-Filho, 2006; Rodríguez et al., 2008; Terribile et al., 2009).                                                                                                                                                                                                                       |
| <i>Starvation resistance</i> | In regions of great seasonality, larger body mass enhances fasting endurance via the allometric scaling of fat reserves (Geist, 1987; Cushman et al., 1993).                                                                                                                                                                                                                                                                                                                                           |

**Table 2. Environmental knockout experiments**

| <b>Label</b>  | <b>Experiment</b>                                                                                                                                                                                                                                                                                     |
|---------------|-------------------------------------------------------------------------------------------------------------------------------------------------------------------------------------------------------------------------------------------------------------------------------------------------------|
| NPP-flat      | <i>Cumulative annual NPP</i> in each cell was set to the mean cumulative annual productivity across all grid cells, derived from the full model simulations. However, this cumulative total was distributed across months in the same proportions as the productivity calculated by the full model.   |
| NPP-aseasonal | <i>Seasonality of NPP</i> in each cell was removed by setting the productivity in each month of the year equal to the mean monthly productivity across the year for that cell.                                                                                                                        |
| T-flat        | <i>Annual mean temperature</i> in each cell was set equal to the global annual mean temperature. However, over the course of the model year the temperature in each cell varied around this global mean with the cell specific absolute deviations found in the original climatological temperatures. |
| T-aseasonal   | <i>Seasonality of temperature</i> in each cell was removed by setting the temperature in each month of the year equal to the annual mean temperature of that cell. We also set the diurnal temperature range in each month of the year equal to the annual mean diurnal temperature of that cell.     |

## Figures

**Figure 1.** Global distributions (a-c) and latitudinal profiles (d-f) of annual mean, community median body masses of endotherms predicted by the Madingley model (a, d), Holocene mammals estimated from empirical data (b, e), present-day birds estimated from empirical data (c, f).

**Figure 2.** The relative effect on community mean endotherm and ectotherm body mass across latitudes of removing spatial variation in cumulative annual primary production, seasonality of primary production, annual mean temperature and annual temperature seasonality. Solid bars represent the median and grey lines the interquartile range across longitudes with each latitude band. Lighter hue indicates negative median effect whilst darker indicates a positive median effect

**Figure 3.** Effect of environmental knockouts in a grid cell centred at 62.5°N and 82.5°E on (a) endotherm community size distribution, (b) probability of assimilating biomass,  $p(A)$ , and of reproducing offspring,  $p(R)$ , within a year, (c) annual mass assimilated, (d) number of offspring produced per individual present at the start of the year, and proportion of individuals present at the start of the year that die from predation (e) or starvation (f) events. The community size distribution is the annual median abundance per mass bin from the 20<sup>th</sup> year of the simulation, dashed lines indicate the community mean body mass for each knockout. Points in b – f represent median predicted values from models fitted to annual data from the last 5 years of a 20 year simulation, error bars represent maximum and minimum value across years.

**Figure 4.** Effect of environmental knockouts in a grid cell centred at 62.5°N and 82.5°E on (a) ectotherm community size distribution, (b) probability of assimilating biomass,  $p(A)$ , and of reproducing offspring,  $p(R)$ , within a year, (c) annual mass assimilated, (d) number of offspring produced per individual present at the start of the year, and proportion of individuals present at the start of the year that die from predation (e) or starvation (f) events. The community size distribution is the annual median abundance per mass bin from the 20<sup>th</sup> year of the simulation, dashed lines indicate the community mean body mass for each

2

knockout. Points in b – f represent median predicted values from models fitted to annual data from the last 5 years of a 20 year simulation, error bars represent maximum and minimum value across years.
